# Supplementary material
Source: PubMed Central journal article supplement (PMC5415873)
Supplement: mp6b01091_si_001.pdf [file mp6b01091_si_001.pdf]

# Tracking Antibody Distribution with Near-Infrared Fluorescent Dyes: Impact of Dye Structure and Degree of Labeling on Plasma Clearance

Cornelius Cilliers<sup>\*</sup>, Ian Nessler<sup>\*</sup>, Nikolas Christodolu<sup>\*</sup>, and Greg M. Thurber<sup>\*#</sup>

<sup>\*</sup> Department of Chemical Engineering, University of Michigan, Ann Arbor, MI 48109

<sup>#</sup> Department of Biomedical Engineering, University of Michigan, Ann Arbor, MI 48109

Supplementary Data

Supplemental Figures – Figures S1 to S5

Supplemental Table – Table S1

Supplemental References

## Supplemental Figures

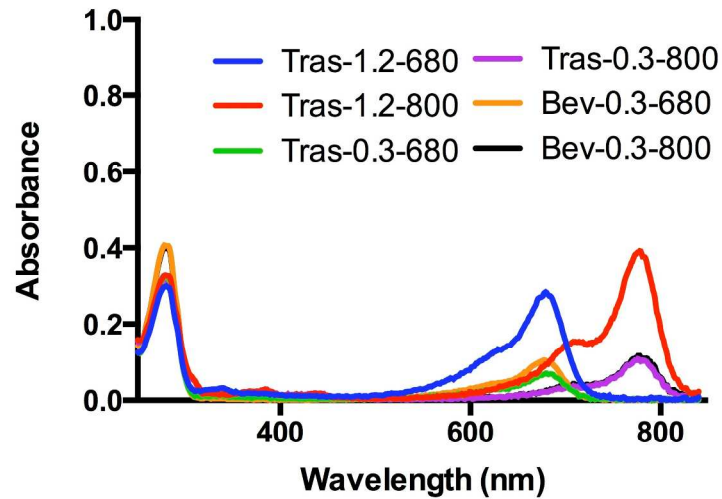

| Antibody-Dye Conjugate | 280nm Absorbance | Dye Max Absorbance | Protein Conc. ( $\mu\text{M}$ ) | Dye Conc. ( $\mu\text{M}$ ) | DoL |
|------------------------|------------------|--------------------|---------------------------------|-----------------------------|-----|
| Bev-0.3-800            | 0.399            | 0.115              | 17.5                            | 4.8                         | 0.3 |
| Tras-0.3-800           | 0.314            | 0.108              | 13.7                            | 4.5                         | 0.3 |
| Tras-1.2-800           | 0.326            | 0.392              | 13.6                            | 16.3                        | 1.2 |
| Bev-0.3-680            | 0.405            | 0.103              | 17.8                            | 5.7                         | 0.3 |
| Tras-0.3-680           | 0.323            | 0.070              | 14.2                            | 3.9                         | 0.3 |
| Tras-1.2-680           | 0.300            | 0.283              | 12.7                            | 15.7                        | 1.2 |

Figure S1 – Antibody-dye absorbance spectra. After reaction and purification, the absorbance spectrum for each antibody-dye conjugate was used to determine the DoL as described in the methods section. DoL was determined by dividing bulk fluorophore concentration by antibody concentration. Tras, trastuzumab; Bev, bevacizumab.

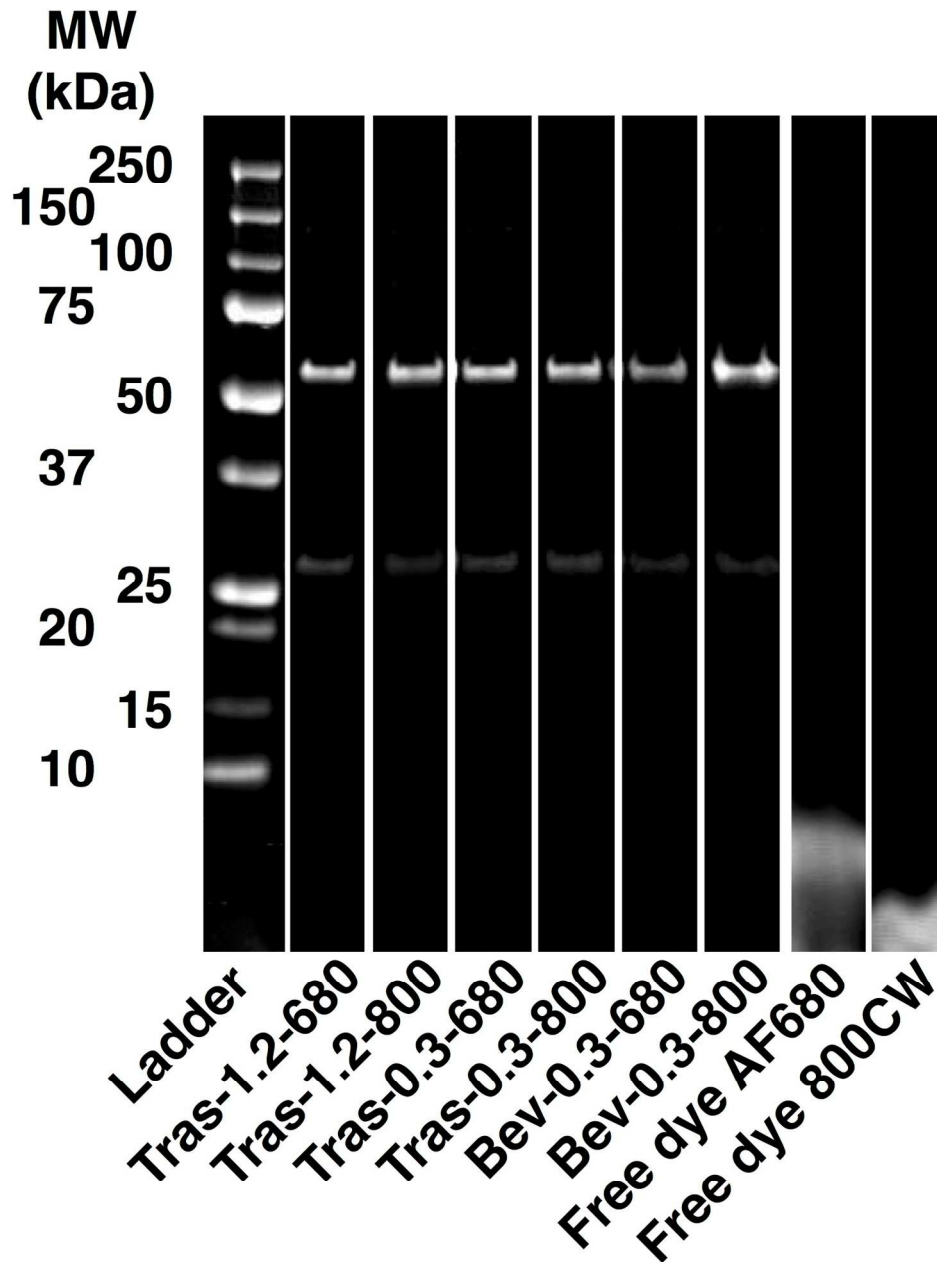

Figure S2 - SDS-PAGE of antibody-dye conjugates and free dye. After reaction and purification all conjugates were run on SDS-PAGE and scanned on the Odyssey CLx NIR scanner to ensure free dye was removed. Window leveling adjusted for similar brightness from heavy chain. Tras, trastuzumab; Bev, bevacizumab.

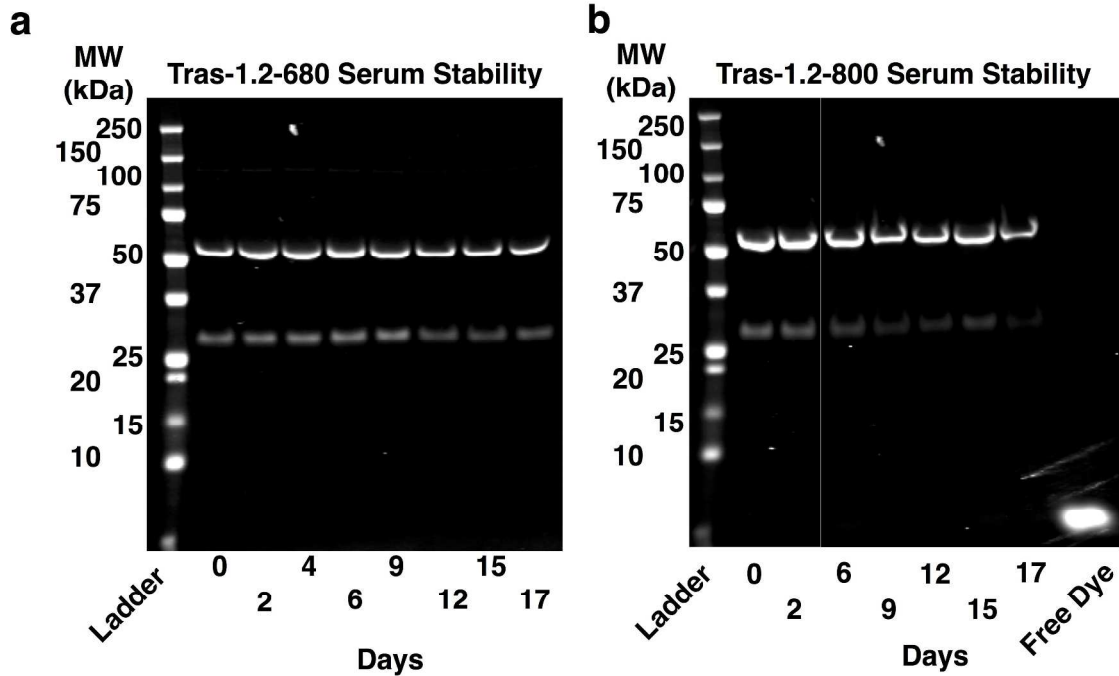

Figure S3 – SDS-PAGE of serum stability samples. Serum stability samples show intact antibody out to 17 days and no detectable formation of free dye.

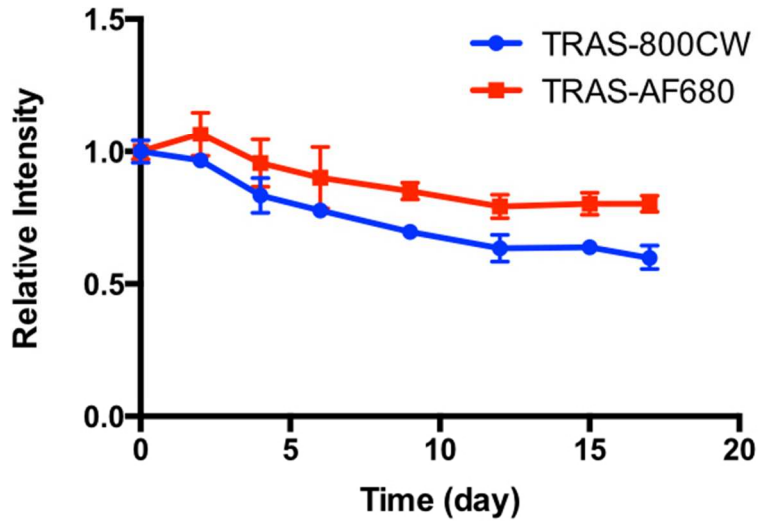

Figure S4 – Antibody-dye conjugate serum stability. Both Tras-AF680 and Tras-800CW show slight loss in fluorescence over 17 days (80% and 60% of initial, respectively); however, the loss in fluorescence does not account for the rapid drop in fluorescent signal seen with 800CW in Fig. 2. Therefore, the loss of fluorescent signal in Fig. 2 is due to clearance of the antibody-dye conjugate, not loss of fluorescence from the dye being in serum. Tras-AF680 and Tras-800CW, both with a DoL of 1.2, were mixed with fetal bovine serum (FBS) at 30nM. The serum/antibody-dye aliquots were thawed rapidly in a 37°C water bath and incubated at 37°C for the number of days shown. The samples were thawed and placed at 37°C in reverse order (17 day time point first) so the samples could all be measured on the same day. 15  $\mu$ L of each sample was scanned in a 384 well plate on the Odyssey CLx, and the experiment was performed in triplicate.

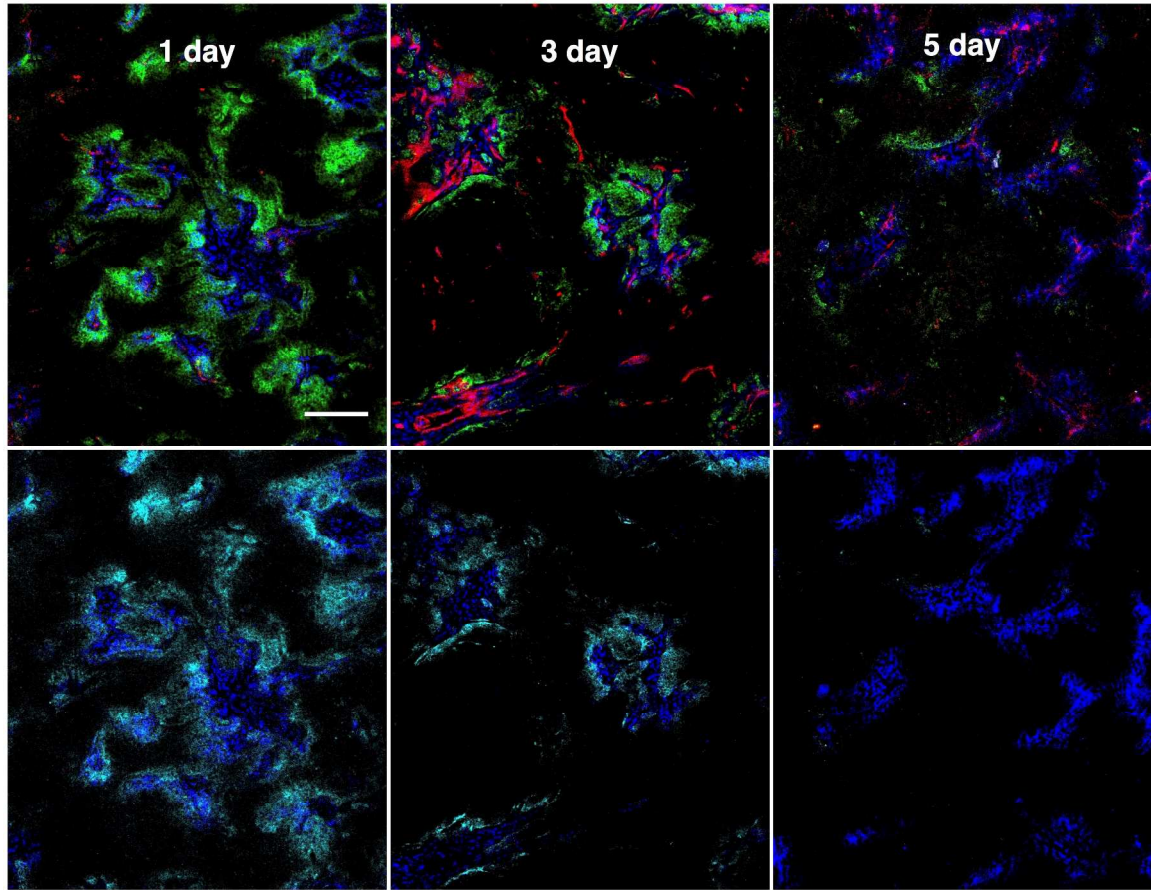

Figure S5 – Comparison of fluorescence detection of directly labeled antibody with a residualizing probe versus immunofluorescence detection of intact antibody over 5 days following administration of 3.6 mg/kg T-DM1-AF680 (green). Hoechst 33342 (blue) was administered 30min prior to sacrifice. Anti-mouse CD31-AF555 (red) and anti-human IgG Fc-AF488(cyan) were labeled *ex vivo*. Scale bar is 200 $\mu$ m.

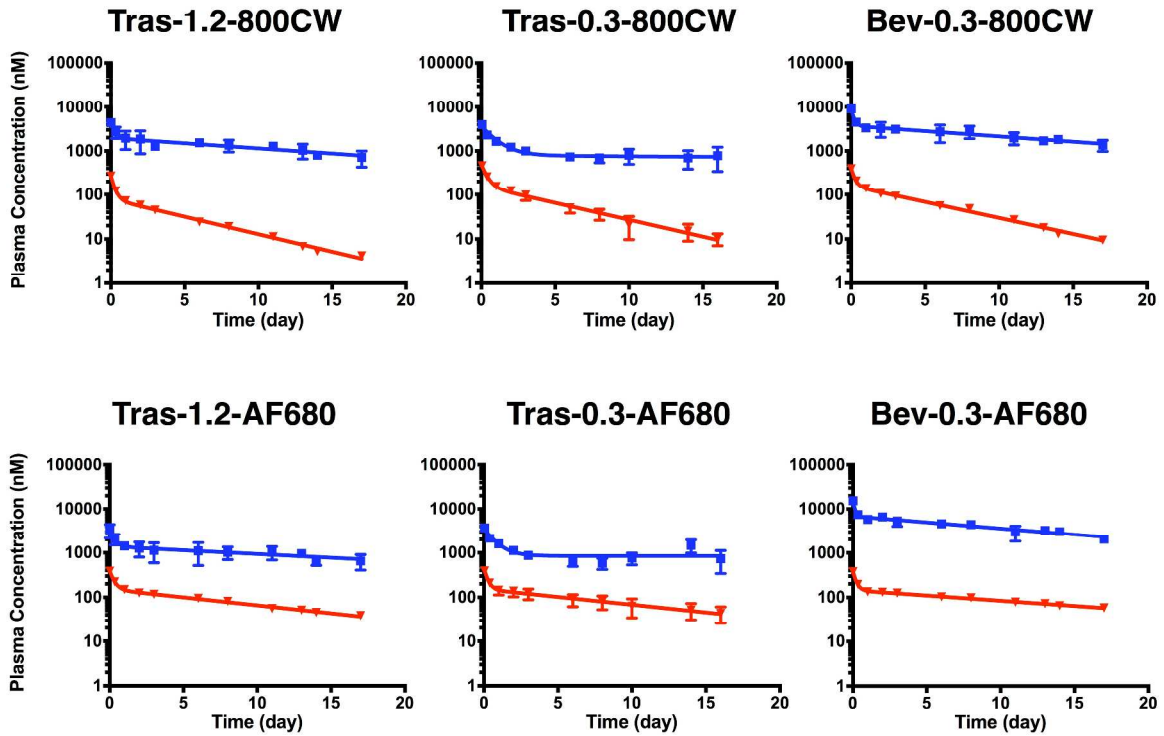

Figure S6 – Absolute concentrations of antibody-dye conjugate plasma clearance. The plasma concentration as measured by fluorescence (red) and ELISA (blue) for trastuzumab-dye conjugates with a low (1.2) and tracer (0.3) DOL (left and middle, respectively), and bevacizumab-dye conjugates with a tracer DOL (right). ELISA concentrations are higher due to the 550 $\mu$ g of total antibody versus 50 $\mu$ g of labeled antibody. Figures 2 and 3 were generated by normalized each data set to the initial concentration. Tras, trastuzumab; Bev, bevacizumab.

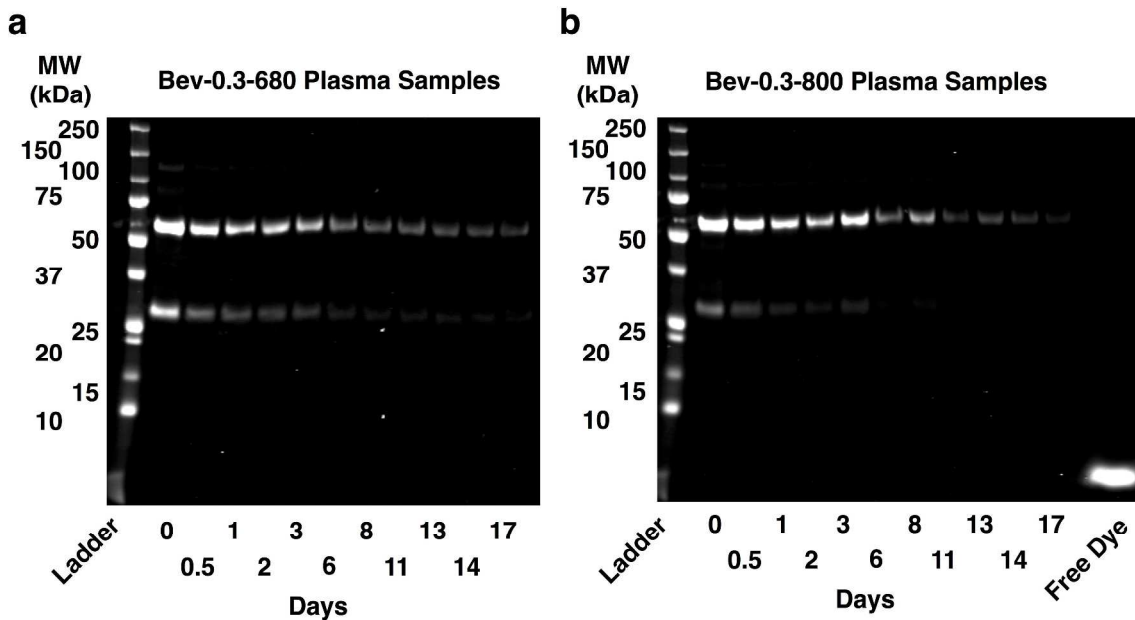

Figure S7 – SDS-PAGE of bevacizumab-AF680 (A) and bevacizumab-800CW (B) plasma clearance samples. Over the course of the experiment bevacizumab-dye conjugates remain intact and there is no detectable formation of free dye.

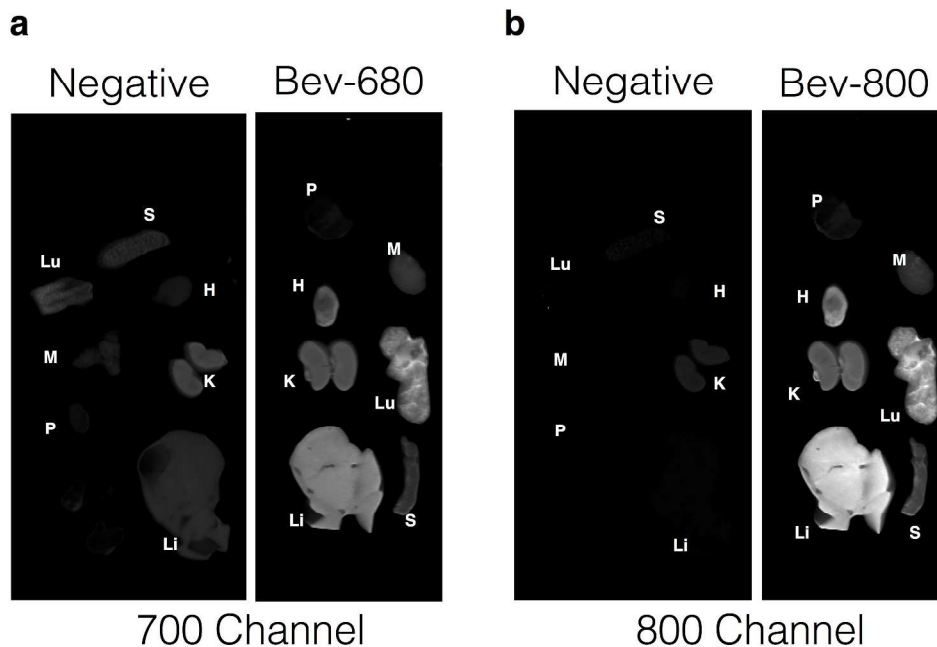

Figure S8 – Fluorescence scan of whole organs. (A) 700-channel scan of negative (uninjected) organs and bevacizumab-AF680 48 hours after injection. (B) 800-channel scan of negative (uninjected) organs and bevacizumab-AF680 48 hours after injection. Before further processing for biodistribution, whole organs were scanned on the Odyssey Clx. Qualitatively the signal intensity from organ scans matches the quantitative uptake from biodistributions (Fig. 5). Window leveling is the same for each channel. Li, liver; Lu, lung; K, kidneys; S, spleen; H, heart; M, muscle; P, pancreas.



Table S1 – Plasma clearance fitted biexponential parameters from PRISM.

| <b>Conjugate</b> | <b>% alpha</b> | <b>alpha (day<sup>-1</sup>)</b> | <b>beta (day<sup>-1</sup>)</b> | <b>AUC</b> | <b>95% C.I.<br/>% alpha</b> | <b>95% C.I.<br/>alpha (day<sup>-1</sup>)</b> | <b>95% C.I.<br/>beta (day<sup>-1</sup>)</b> |
|------------------|----------------|---------------------------------|--------------------------------|------------|-----------------------------|----------------------------------------------|---------------------------------------------|
| Bev-0.3-680-F    | 61.6           | 4.410                           | 0.054                          | 7.27       | 59.89 to 63.22              | 3.617 to 5.203                               | 0.04963 to 0.05818                          |
| Bev-0.3-680-E    | 55.3           | 7.741                           | 0.065                          | 6.94       | 48.90 to 61.74              | -1.262 to 16.74                              | 0.05066 to 0.07952                          |
| Bev-0.3-800-F    | 60.5           | 4.123                           | 0.166                          | 2.53       | 55.28 to 65.72              | 1.917 to 6.330                               | 0.1530 to 0.1790                            |
| Bev-0.3-800-E    | 58.9           | 5.817                           | 0.056                          | 7.41       | 54.69 to 63.12              | 2.694 to 8.940                               | 0.04597 to 0.06646                          |
| Tras-1.2-680-F*  | 60.6           | 3.316                           | 0.083                          | 4.92       | 58.38 to 62.83              | 2.594 to 4.039                               | 0.07771 to 0.08864                          |
| Tras-1.2-680-E*  | 58.4           | 3.063                           | 0.038                          | 11.10      | 4.022 to 57.25              | -3435 to 3489                                | 0.03920 to 0.1205                           |
| Tras-1.2-800-F   | 70.8           | 3.917                           | 0.181                          | 1.79       | 66.39 to 75.28              | 2.220 to 5.615                               | 0.1663 to 0.1961                            |
| Tras-1.2-800-E   | 55.3           | 3.505                           | 0.054                          | 8.38       | 46.11 to 64.54              | 0.1096 to 6.900                              | 0.03424 to 0.07439                          |
| Tras-0.3-680-F   | 61.6           | 3.403                           | 0.080                          | 5.01       | 57.86 to 65.35              | 2.204 to 4.603                               | 0.06927 to 0.08975                          |
| Tras-0.3-680-E   | 80.9           | 1.083                           | 0.011                          | 18.01      | 69.95 to 91.94              | 0.4738 to 1.692                              | 0.0 to 0.06237                              |
| Tras-0.3-800-F   | 66.6           | 2.383                           | 0.174                          | 2.20       | 58.86 to 74.28              | 1.038 to 3.727                               | 0.1505 to 0.1968                            |
| Tras-0.3-800-E   | 78.5           | 1.234                           | 0.011                          | 21.05      | 71.90 to 85.14              | 0.7783 to 1.690                              | 0.0 to 0.03854                              |

Tras, trastuzumab; Bev, bevacizumab; F, fluorescence; E, ELISA.

Note: These data (\*) were published in the supplementary data section (Fig. S7) of <sup>1</sup>

## References

1. Cilliers, C.; Guo, H.; Liao, J.; Christodolu, N.; Thurber, G. M. Multiscale Modeling of Antibody-Drug Conjugates: Connecting Tissue and Cellular Distribution to Whole Animal Pharmacokinetics and Potential Implications for Efficacy. *The AAPS journal* **2016**.
